# Supplementary figures and images for: One‐Step Route to Synthesize Multiwalled Carbon Nanotubes Filled with MgO Nanorods
Source: Hindawi journal article supplement (doi:10.1155/2010/671863), 2010-01-01

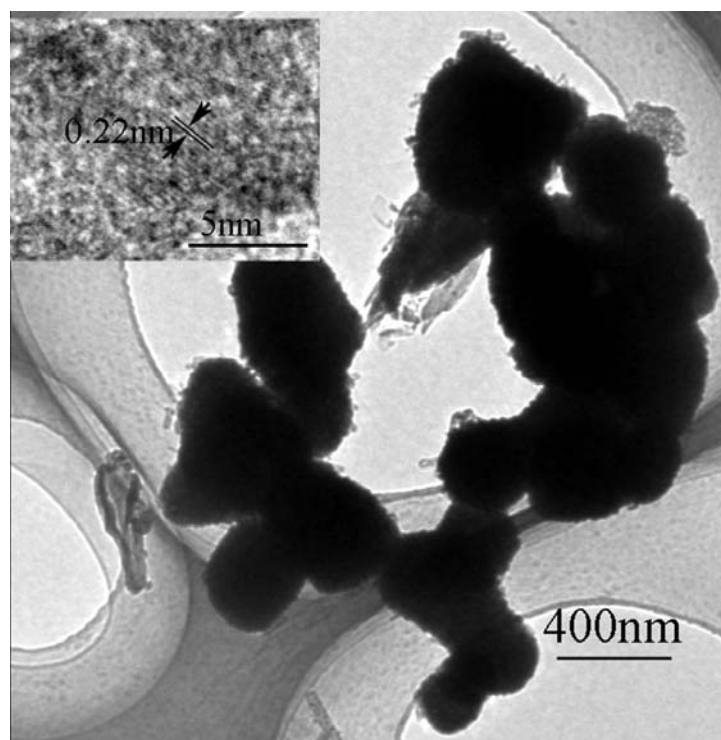

**Fig. S1. Supporting Information**

Supplement: f1 [file 671863.f1.pdf]
